# Supplementary material
Source: PubMed Central journal article supplement (PMC8982273)
Supplement: NIHMS1791376-supplement-SI.pdf [file NIHMS1791376-supplement-SI.pdf]

# Supplementary Information

## Studies of Surface Preparation for the Fluorosequencing of Peptides

Caroline M. Hinson,<sup>†</sup> Angela M. Bardo,<sup>‡</sup> Cassie E. Shannon,<sup>†</sup> Sebastian Rivera,<sup>†</sup> Jagannath Swaminathan,<sup>‡</sup> Edward M. Marcotte,<sup>\* ‡</sup> Eric V. Anslyn<sup>\*†</sup>

<sup>†</sup>Department of Chemistry, The University of Texas at Austin, Austin, TX 78712, USA

<sup>‡</sup>Department of Molecular Biosciences, The University of Texas at Austin, Austin, TX, 78712, USA

\*Corresponding authors: [edward.marcotte@gmail.com](mailto:edward.marcotte@gmail.com); [anslyn@austin.utexas.edu](mailto:anslyn@austin.utexas.edu)

ORCID: C.M.H., 0000-0002-0997-2346; A.M.B., 0000-0002-6637-4748; C.E.S., 0000-0002-6884-7270; S.R., 0000-0002-1641-9311; J.S., 0000-0002-5005-7182; E.M.M., 0000-0001-8808-180X; E.V.A., 0000-0002-5137-8797

## Table of Contents

|                                                                              | Page |
|------------------------------------------------------------------------------|------|
| Figure S1                                                                    | S3   |
| Figure S2: HiRes MS data for modified Atto647N for aldehyde labeling         | S4   |
| Figure S3: HiRes MS data for Fluorophore Labeling of P1                      | S5   |
| Figure S4: HiRes MS data for Fluorophore Labeling of P2                      | S6   |
| Figure S5: HiRes MS data for Fluorophore Labeling of P3                      | S7   |
| Figure S6: HiRes MS data for Fluorophore Labeling of PS1                     | S8   |
| Table S1: Average difference between initial and TFA3 of samples in Figure 4 | S9   |
| Table S2: Average difference between initial and TFA3 of samples in Figure 5 | S10  |
| Table S3: Average difference between initial and TFA3 of samples in Figure 6 | S11  |

Figure S1

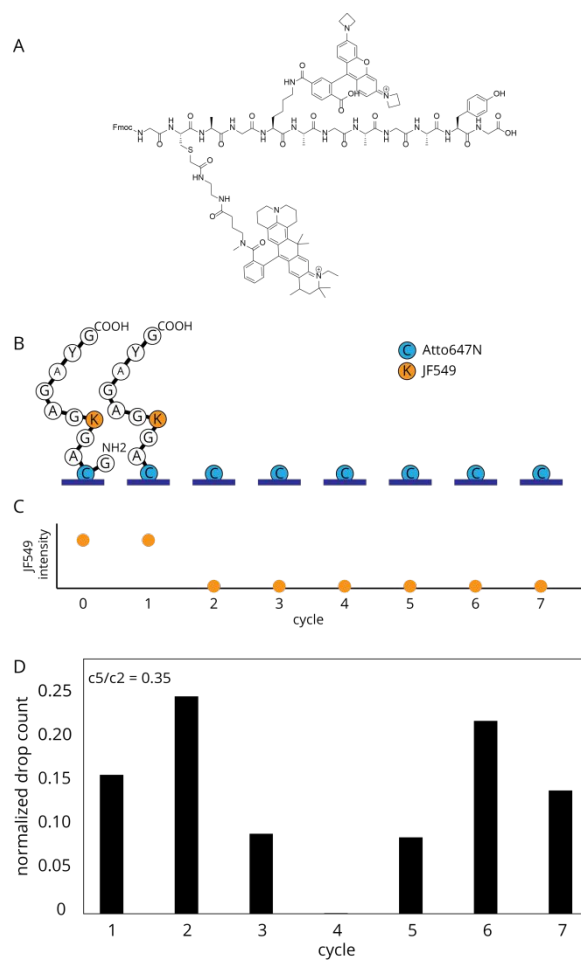

**FIGURE S1.** A) Structure of peptide PS1 B) Expected sequence changes of a single PS1 peptide attached through the Atto647N after rounds of Edman degradation C) The relative fluorescence changes for Atto647N on JF549 attached peptide P2 where signal loss is correlated to liberation of the remaining peptide after Edman degradation at the labeled lysine. D) Fluorosequencing results for peptides PS1, with a peak drop count after the second Edman cycle (normalized to total counts, n=6450).

Figure S2: HiRes MS data for modified Atto647N for aldehyde labeling

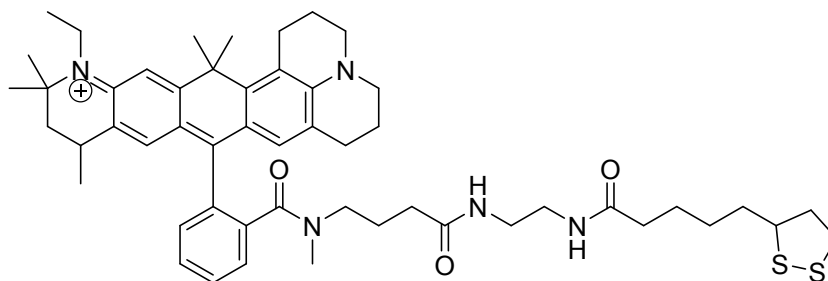

Chemical Formula:  $C_{52}H_{70}N_5O_3S_2^+$

Exact Mass: 876.49

m/z: 876.49 (100.0%), 877.50 (57.2%), 878.50 (16.7%), 878.49 (11.0%), 879.49 (5.3%), 879.50 (3.9%),  
877.49 (3.4%), 880.49 (1.6%)

MS Zoomed Spectrum

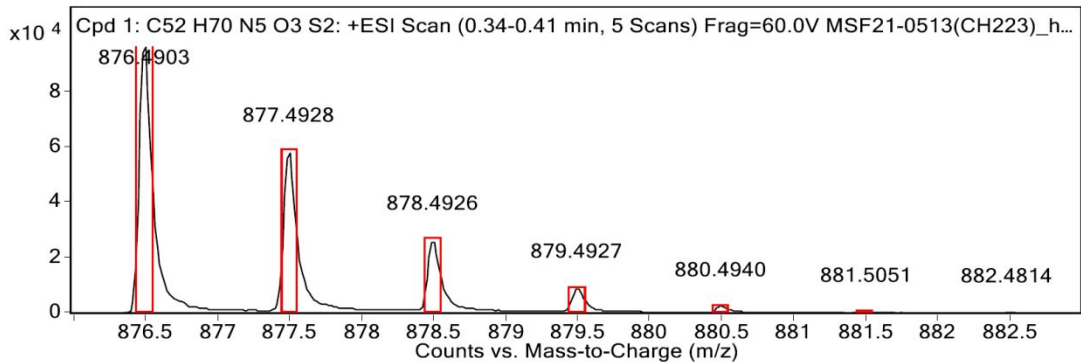

MS Spectrum Peak List

| Obs. m/z | Calc. m/z | Charge | Abundance | Formula                 | Ion Species | Tgt Mass Error (ppm) |
|----------|-----------|--------|-----------|-------------------------|-------------|----------------------|
| 876.4903 | 876.4915  | 1      | 97795     | $C_{52}H_{70}N_5O_3S_2$ | M+          | 1.28                 |
| 877.4928 | 877.4946  | 1      | 58535     | $C_{52}H_{70}N_5O_3S_2$ | M+          | 2.04                 |
| 878.4926 | 878.4942  | 1      | 26609     | $C_{52}H_{70}N_5O_3S_2$ | M+          | 1.87                 |
| 879.4927 | 879.4947  | 1      | 9192      | $C_{52}H_{70}N_5O_3S_2$ | M+          | 2.26                 |
| 880.4940 | 880.4951  | 1      | 2453      | $C_{52}H_{70}N_5O_3S_2$ | M+          | 1.19                 |
| 881.5051 | 881.4956  | 1      | 455       | $C_{52}H_{70}N_5O_3S_2$ | M+          | -10.77               |
| 882.4814 | 882.4963  | 1      | 229       | $C_{52}H_{70}N_5O_3S_2$ | M+          | 16.96                |

--- End Of Report ---

Figure S3: HiRes MS data for fluorophore labeling of P1

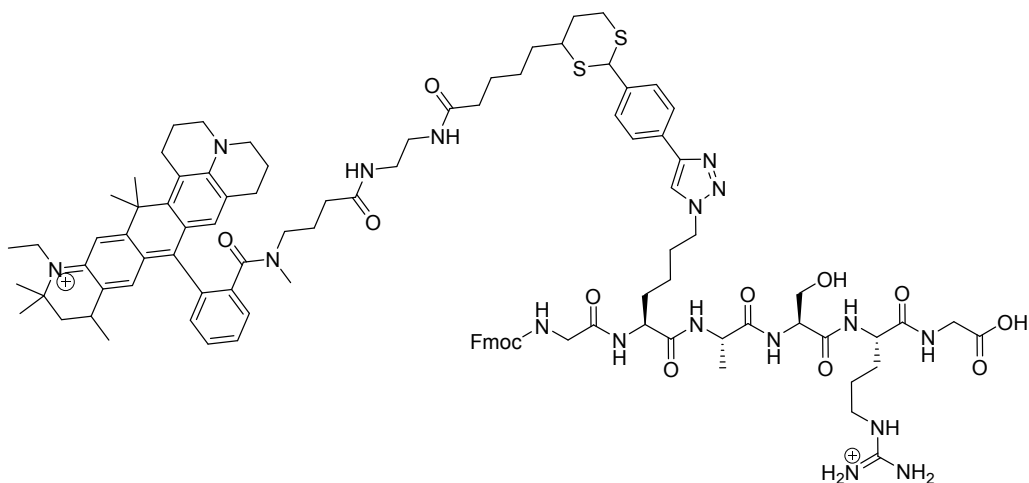

Chemical Formula:  $C_{98}H_{127}N_{17}O_{13}S_2^{2+}$

Exact Mass: 1813.92

m/z: 907.46 (100.0%), 906.96 (92.6%), 907.96 (57.6%), 908.46 (25.3%), 907.96 (14.8%), 908.46 (9.8%), 907.46 (7.3%), 908.96 (6.6%), 908.97 (6.4%), 909.46 (2.4%), 909.47 (1.6%), 908.96 (1.2%)

MS Zoomed Spectrum

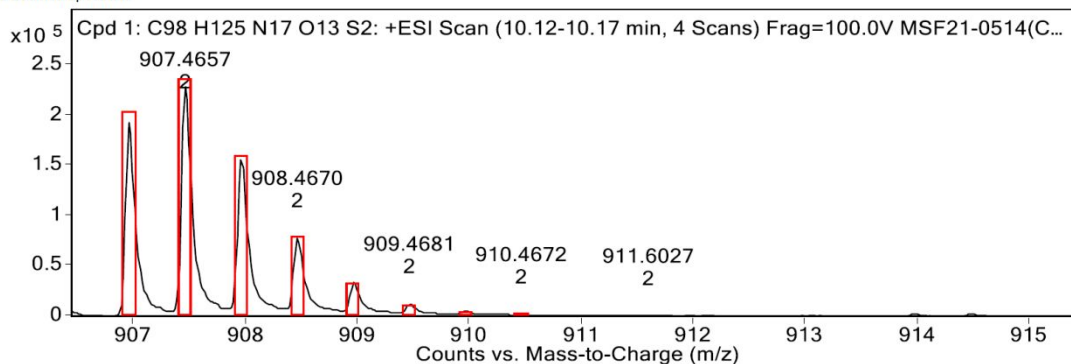

MS Spectrum Peak List

| Obs. m/z | Calc. m/z | Charge | Abundance | Formula         | Ion Species | Tgt Mass Error (ppm) |
|----------|-----------|--------|-----------|-----------------|-------------|----------------------|
| 605.3137 |           |        | 300642    |                 |             |                      |
| 906.9647 | 906.9615  | 2      | 194673    | C98H125N17O13S2 | (M+2H)+2    | -3.55                |
| 907.4657 | 907.4630  | 2      | 230659    | C98H125N17O13S2 | (M+2H)+2    | -2.99                |
| 907.9664 | 907.9639  | 2      | 157803    | C98H125N17O13S2 | (M+2H)+2    | -2.77                |
| 908.4670 | 908.4646  | 2      | 78569     | C98H125N17O13S2 | (M+2H)+2    | -2.65                |
| 908.9686 | 908.9652  | 2      | 34409     | C98H125N17O13S2 | (M+2H)+2    | -3.77                |
| 909.4681 | 909.4658  | 2      | 12950     | C98H125N17O13S2 | (M+2H)+2    | -2.51                |
| 909.9609 | 909.9664  | 2      | 5052      | C98H125N17O13S2 | (M+2H)+2    | 6.12                 |
| 910.4672 | 910.4671  | 2      | 2436      | C98H125N17O13S2 | (M+2H)+2    | -0.09                |
| 911.0305 | 910.9678  | 2      | 1523      | C98H125N17O13S2 | (M+2H)+2    | -68.76               |

--- End Of Report ---

Figure S4: HiRes MS data for Fluorophore Labeling of P2

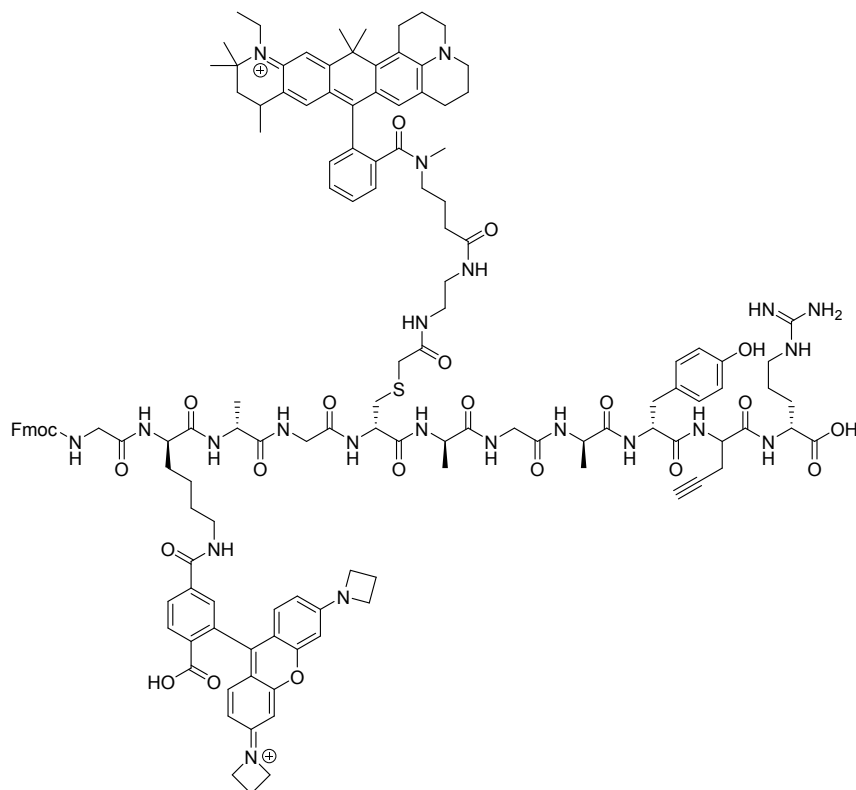

Chemical Formula:  $C_{132}H_{158}N_{22}O_{22}S^{2+}$

Exact Mass: 2435.16

m/z: 1218.08 (100.0%), 1218.58 (76.2%), 1217.58 (68.8%), 1219.08 (43.9%), 1219.59 (15.5%), 1218.58 (11.3%), 1219.58 (6.8%), 1218.08 (6.1%), 1220.09 (5.2%), 1219.08 (5.1%), 1220.08 (3.1%), 1219.09 (1.9%), 1220.59 (1.8%)

Elemental Analysis: C, 65.06; H, 6.54; N, 12.65; O, 14.44; S, 1.32

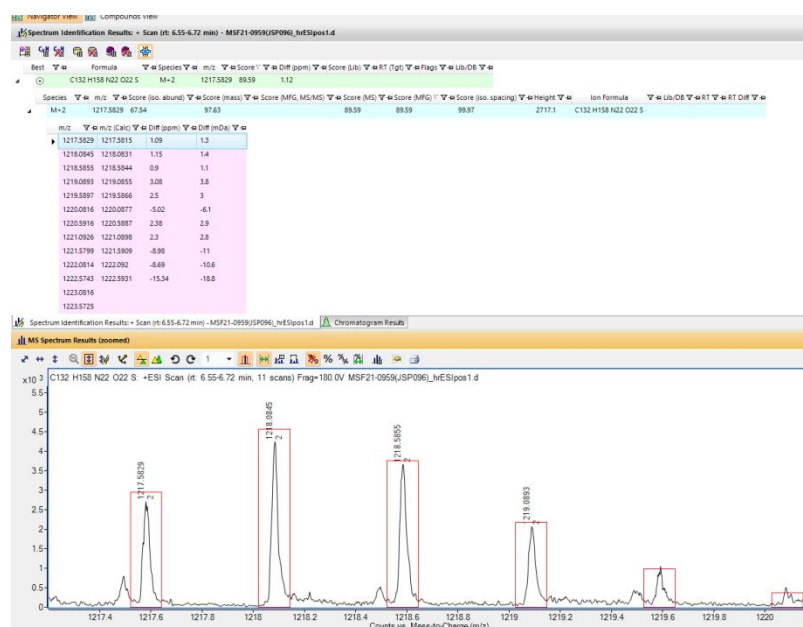

Figure S5: HiRes MS data for Fluorophore Labeling of P3

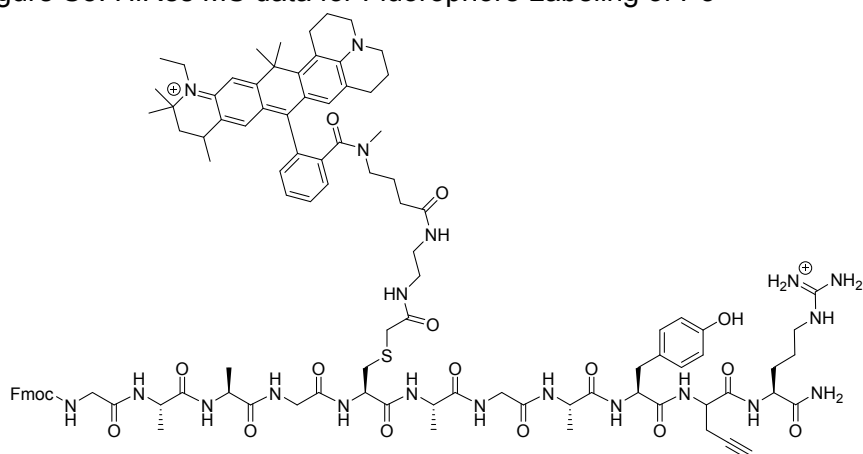

Chemical Formula:  $C_{102}H_{132}N_{20}O_{17}S^{2+}$   
Exact Mass: 1940.98

m/z: 970.99 (100.0%), 970.49 (83.9%), 971.49 (52.6%), 971.99 (23.2%), 971.49 (14.5%), 971.99 (8.6%), 972.49 (8.6%),  
972.49 (3.2%), 972.99 (2.1%), 970.99 (1.3%), 973.00 (1.2%)  
Elemental Analysis: C, 63.07; H, 6.85; N, 14.42; O, 14.00; S, 1.65

MS Zoomed Spectrum

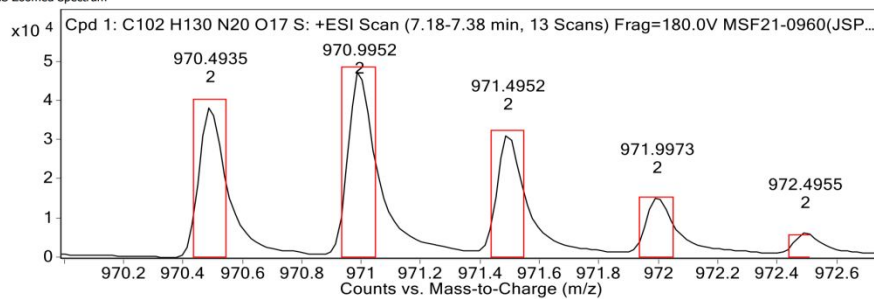

MS Spectrum Peak List

| Obs. m/z | Calc. m/z | Charge | Abundance | Formula                                                             | Ion Species          | Tgt Mass Error (ppm) |
|----------|-----------|--------|-----------|---------------------------------------------------------------------|----------------------|----------------------|
| 265.1787 |           |        | 242900    |                                                                     |                      |                      |
| 970.4935 | 970.4895  | 2      | 38608     | C <sub>102</sub> H <sub>130</sub> N <sub>20</sub> O <sub>17</sub> S | (M+2H) <sup>2+</sup> | -4.15                |
| 970.9952 | 970.9909  | 2      | 47953     | C <sub>102</sub> H <sub>130</sub> N <sub>20</sub> O <sub>17</sub> S | (M+2H) <sup>2+</sup> | -4.42                |
| 971.4952 | 971.4921  | 2      | 31633     | C <sub>102</sub> H <sub>130</sub> N <sub>20</sub> O <sub>17</sub> S | (M+2H) <sup>2+</sup> | -3.12                |
| 971.9973 | 971.9931  | 2      | 15476     | C <sub>102</sub> H <sub>130</sub> N <sub>20</sub> O <sub>17</sub> S | (M+2H) <sup>2+</sup> | -4.35                |
| 972.4955 | 972.4941  | 2      | 6530      | C <sub>102</sub> H <sub>130</sub> N <sub>20</sub> O <sub>17</sub> S | (M+2H) <sup>2+</sup> | -1.51                |
| 973.0350 | 972.9950  | 2      | 2973      | C <sub>102</sub> H <sub>130</sub> N <sub>20</sub> O <sub>17</sub> S | (M+2H) <sup>2+</sup> | -41.12               |
| 973.4877 | 973.4960  | 2      | 1248      | C <sub>102</sub> H <sub>130</sub> N <sub>20</sub> O <sub>17</sub> S | (M+2H) <sup>2+</sup> | 8.52                 |

Figure S6: HiRes MS data for Fluorophore Labeling of PS1

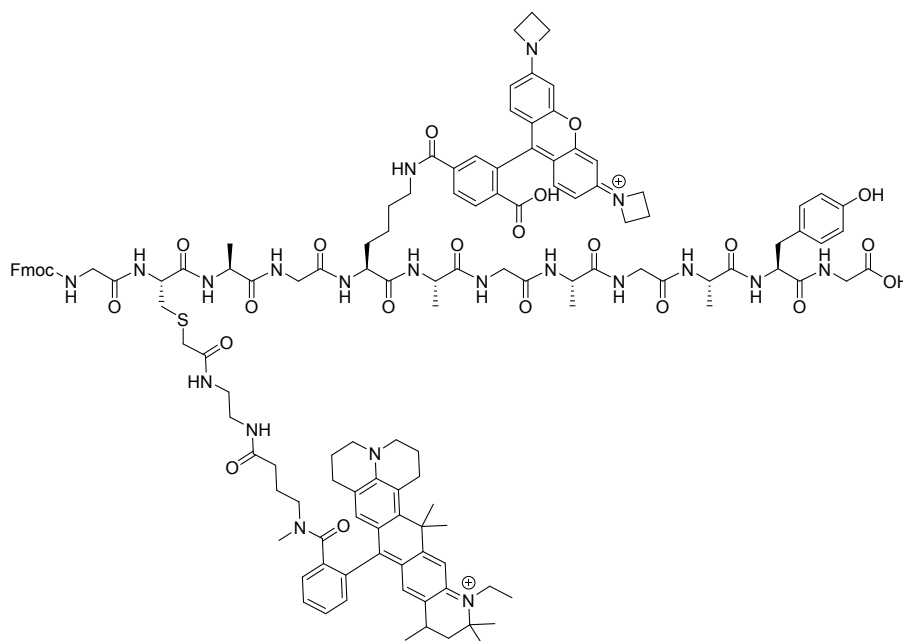

Chemical Formula:  $C_{128}H_{152}N_{20}O_{23}S^{2+}$

Exact Mass: 2369.10

Molecular Weight: 2370.80

m/z: 1185.05 (100.0%), 1185.55 (79.4%), 1184.55 (70.5%), 1186.06 (32.3%), 1186.05 (15.1%), 1186.56 (14.7%), 1186.55 (6.3%), 1187.06 (5.4%), 1185.05 (5.2%), 1185.55 (3.4%), 1187.05 (2.3%), 1185.56 (1.7%), 1187.56 (1.4%)

Elemental Analysis: C, 64.85; H, 6.46; N, 11.82; O, 15.52; S, 1.35

MS Zoomed Spectrum

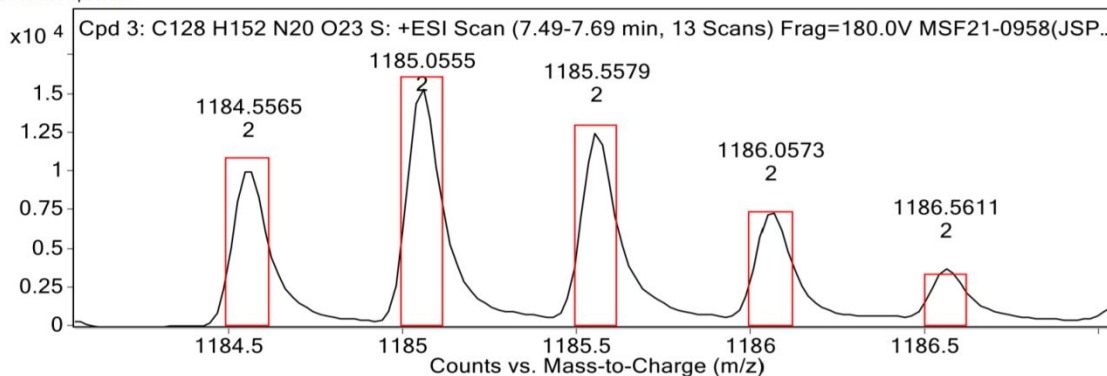

MS Spectrum Peak List

| Obs. m/z  | Calc. m/z | Charge | Abundance | Formula                                                             | Ion Species | Tgt Mass Error (ppm) |
|-----------|-----------|--------|-----------|---------------------------------------------------------------------|-------------|----------------------|
| 797.7037  |           |        | 109711    |                                                                     |             |                      |
| 1184.5565 | 1184.5524 | 2      | 10248     | C <sub>128</sub> H <sub>152</sub> N <sub>20</sub> O <sub>23</sub> S | M+2         | -3.41                |
| 1185.0555 | 1185.0540 | 2      | 15393     | C <sub>128</sub> H <sub>152</sub> N <sub>20</sub> O <sub>23</sub> S | M+2         | -1.3                 |
| 1185.5579 | 1185.5553 | 2      | 12527     | C <sub>128</sub> H <sub>152</sub> N <sub>20</sub> O <sub>23</sub> S | M+2         | -2.21                |
| 1186.0573 | 1186.0564 | 2      | 7438      | C <sub>128</sub> H <sub>152</sub> N <sub>20</sub> O <sub>23</sub> S | M+2         | -0.76                |
| 1186.5611 | 1186.5575 | 2      | 3739      | C <sub>128</sub> H <sub>152</sub> N <sub>20</sub> O <sub>23</sub> S | M+2         | -3                   |
| 1187.0540 | 1187.0586 | 2      | 1453      | C <sub>128</sub> H <sub>152</sub> N <sub>20</sub> O <sub>23</sub> S | M+2         | 3.89                 |
| 1187.5691 | 1187.5596 | 2      | 724       | C <sub>128</sub> H <sub>152</sub> N <sub>20</sub> O <sub>23</sub> S | M+2         | -8.01                |
| 1188.0141 | 1188.0607 | 2      | 356       | C <sub>128</sub> H <sub>152</sub> N <sub>20</sub> O <sub>23</sub> S | M+2         | 39.25                |
| 1188.5406 | 1188.5618 | 2      | 257       | C <sub>128</sub> H <sub>152</sub> N <sub>20</sub> O <sub>23</sub> S | M+2         | 17.82                |



Table S1: Average difference between initial and TFA3 of samples in Figure 4.

Average difference between initial and TFA3

|          | EDC        | Buffer only |
|----------|------------|-------------|
| None     | 1067 ± 121 | 357 ± 73    |
| Hexyl    | 1162 ± 153 | 340 ± 226   |
| n-propyl | 1419 ± 67  | 357 ± 172   |
| t-butyl  | 1480 ± 237 | 508 ± 154   |
| PEG-3    | 1514 ± 129 | 185 ± 57    |

Table S2: Average difference between initial and TFA3 of samples in Figure 5

Average difference between initial and TFA3

|            | EDC        | Buffer only |
|------------|------------|-------------|
| 0 PEG-3    | 2123 ± 75  | 1432 ± 78   |
| 0.75 PEG-3 | 623 ± 61   | 132 ± 16    |
| 1.5 PEG-3  | 1249 ± 367 | 141 ± 48    |
| 2.0 PEG-3  | 1194 ± 251 | 224 ± 32    |
| 2.5 PEG-3  | 936 ± 245  | 262 ± 27    |
| 0 PEG-3    | 1354 ± 188 | 327 ± 53    |
| 0.75 PEG-3 | 1053 ± 155 | 178 ± 51    |
| 1.5 PEG-3  | 895 ± 101  | 211 ± 50    |
| 2.0 PEG-3  | 1287 ± 78  | 274 ± 59    |
| 2.5 PEG-3  | 1064 ± 109 | 345 ± 70    |
| 0 PEG-3    | 149 ± 12   | 103 ± 15    |
| 0 PEG-3    | 532 ± 48   | 516 ± 95    |
| 0.75 PEG-3 | 439 ± 59   | 128 ± 20    |
| 1.5 PEG-3  | 799 ± 38   | 300 ± 15    |
| 2.0 PEG-3  | 538 ± 217  | 280 ± 69    |
| 2.5 PEG-3  | 857 ± 69   | 170 ± 20    |
| 0 PEG-3    | 1034 ± 52  | 775 ± 73    |
| 0 PEG-3    | 373 ± 28   | 219 ± 29    |
| 0.75 PEG-3 | 1289 ± 166 | 825 ± 52    |
| 1.5 PEG-3  | 434 ± 52   | 332 ± 39    |
| 2.0 PEG-3  | 609 ± 82   | 529 ± 58    |

Table S3: Average difference between initial and TFA3 of samples in Figure 6

| Average difference between initial and TFA3 |            |             |
|---------------------------------------------|------------|-------------|
|                                             | EDC        | Buffer only |
| 0PEG0APTES_1                                | 1581 ± 73  | 857 ± 122   |
| 0PEG0APTES_2                                | 1110 ± 245 | 376 ± 61    |
| 0PEG0APTES_3                                | 1578 ± 107 | 1399 ± 71   |
| 0PEG1APTES_1                                | 619 ± 80   | 496 ± 43    |
| 0PEG1APTES_2                                | 164 ± 127  | 892 ± 65    |
| 0PEG1APTES_3                                | 241 ± 60   | 214 ± 31    |
| 2PEG0APTES_1                                | 1234 ± 141 | 713 ± 80    |
| 2PEG0APTES_2                                | 1874 ± 57  | 716 ± 80    |
| 2PEG0APTES_3                                | 1262 ± 75  | 829 ± 67    |
| 2PEG1APTES_1                                | 694 ± 48   | 732 ± 44    |
| 2PEG1APTES_2                                | 750 ± 55   | 727 ± 51    |
| 2PEG1APTES_3                                | 817 ± 74   | 589 ± 38    |
